# Supplementary material for: Formation of ceramic microstructures: honeycomb patterned polymer films as structure-directing agent
Source: Royal Society of Chemistry journal article supplement (doi:10.1039/c0jm00405g), 2010-01-01
Supplement: c0jm00405g.pdf [file c0jm00405g.pdf]

## Supporting Information

### Formation of Ceramic Microstructures:

#### Honeycomb Patterned Polymer Films as Structure-directing Agent

Lei Li<sup>1\*</sup>, Jian Li<sup>1</sup>, Yawen Zhong<sup>1</sup>, Caikang Chen<sup>1</sup>, Yi Ben<sup>2</sup>, Jianliang Gong<sup>1</sup>, Zhi Ma<sup>3\*</sup>

1. College of Materials, Xiamen University, Xiamen, 361005, P. R. China

2. Analysis & Test Center , Xiamen University, Xiamen, 361005, P. R. China

3. Shanghai Institute of Organic Chemistry, Chinese Academy of Sciences, Shanghai  
200032, P. R. China

\* To whom correspondence should be addressed.

Tel: +86-592-2186296; Fax: +86-592-2183937;

E-mail: [lilei@xmu.edu.cn](mailto:lilei@xmu.edu.cn); [mazhi728@sioc.ac.cn](mailto:mazhi728@sioc.ac.cn)

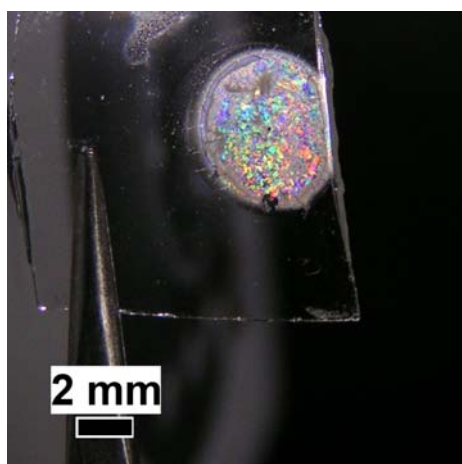

**Figure S1.** Photograph of sunlight diffraction obtained from a honeycomb structured PDMS-*b*-PS film on glass substrate after 4h UV irradiation.

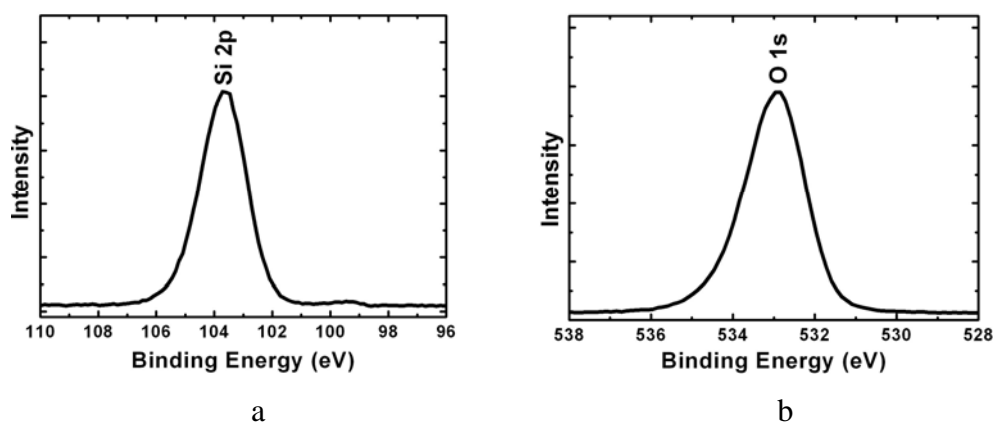

**Figure S2.** XPS core level scans of a) Si and b) O after pyrolysis of honeycomb structured PDMS-*b*-PS film.

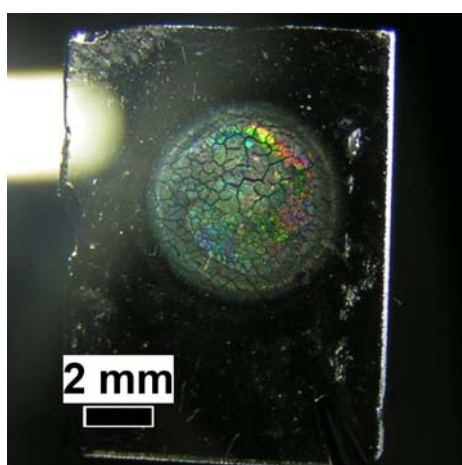

**Figure S3.** Photograph of sunlight diffraction obtained from a honeycomb structured silica on glass substrate.
